# Supplementary material for: Anin silicoperception for newly isolated flavonoids from peach fruit as privileged avenue for a countermeasure outbreak of COVID-19
Source: Royal Society of Chemistry journal article supplement (doi:10.1039/d0ra05265e), 2020-01-01

## Supplementary materials

**Figure 1S:**  $^1\text{H}$ -NMR spectrum of compound **1** ( $\text{CD}_3\text{OD}$ , 600 MHz).

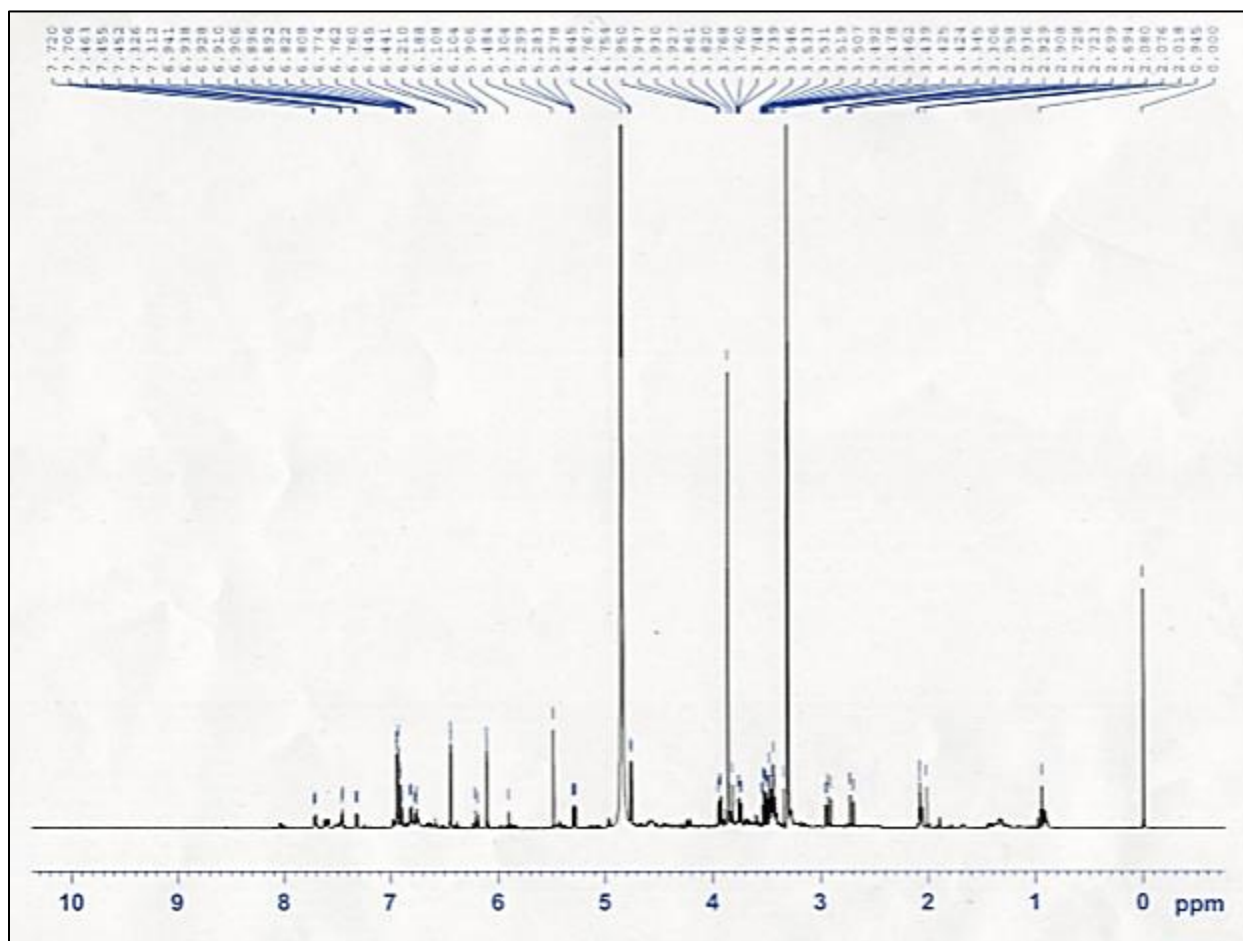

**Figure 2S:**  $^{13}\text{C}$ -NMR spectrum of compound **1** ( $\text{CD}_3\text{OD}$ , 150 MHz).

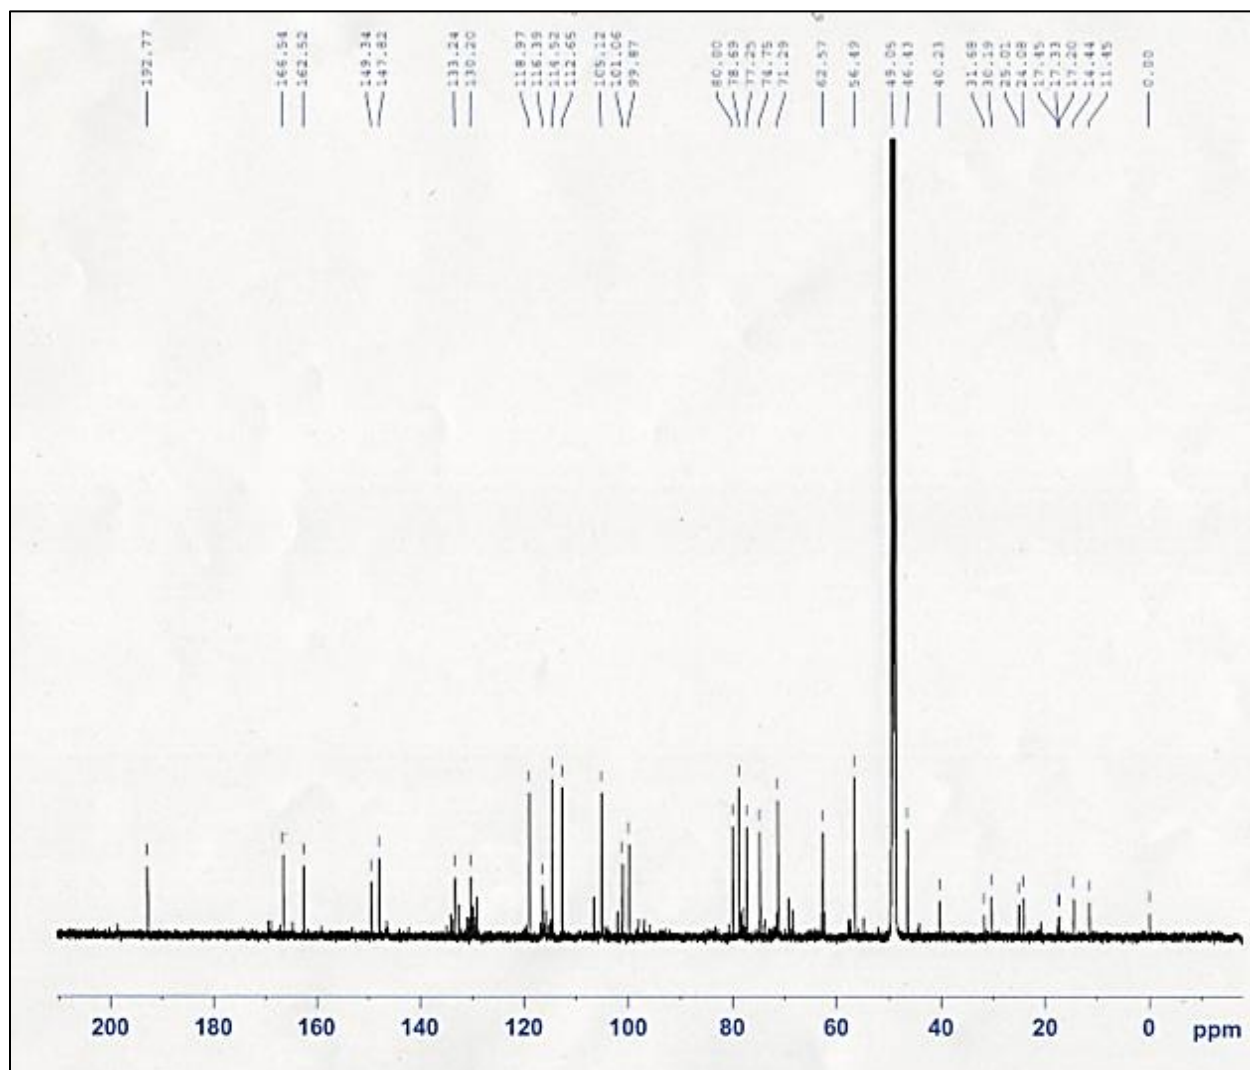

**Figure 3S:** HMBC spectrum of compound **1** (CD<sub>3</sub>OD).

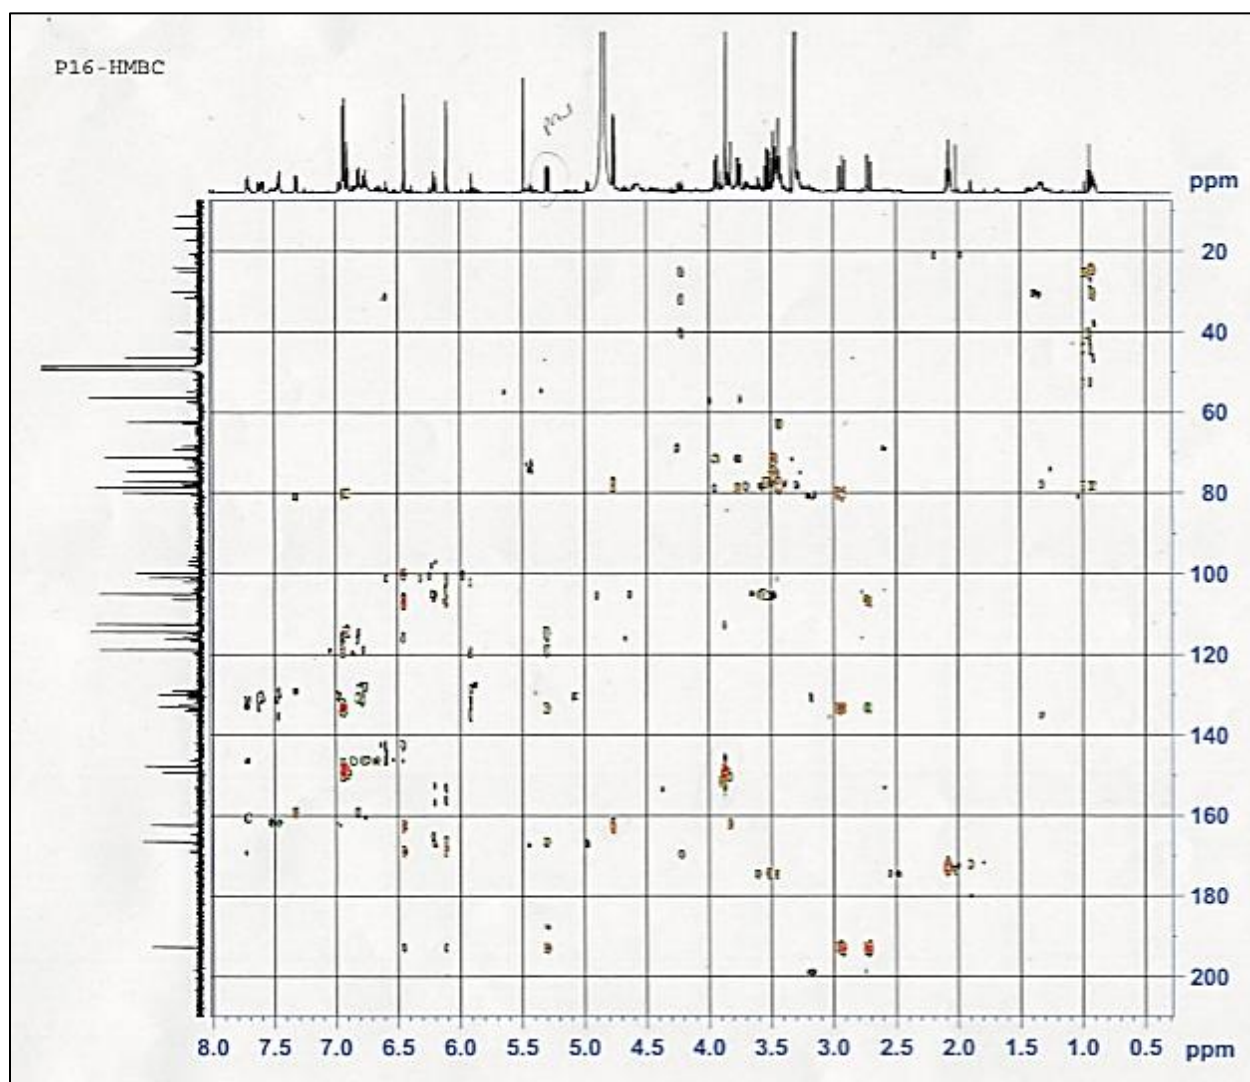

**Figure 4S:** Positive FAB-MS spectrum of compound **1**.

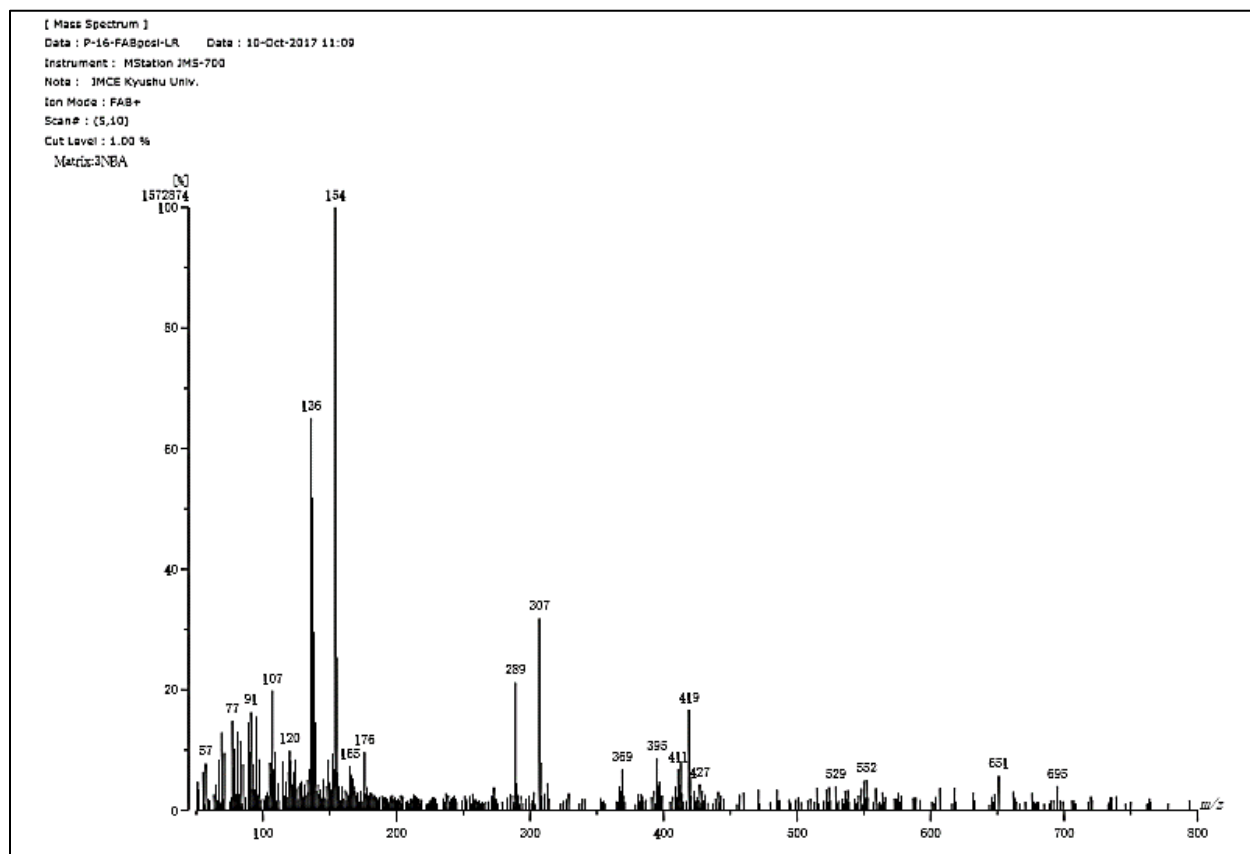

Supplement: d0ra05265e1.pdf [file d0ra05265e1.pdf]
